# Supplementary material for: Stability, electronic and mechanical properties of chalcogen (Se and Te) monolayers
Source: Royal Society of Chemistry journal article supplement (doi:10.1039/d0cp00511h), 2020-01-01
Supplement: d0cp00511h1.pdf [file d0cp00511h1.pdf]

## SUPPLEMENTARY DATA

**TABLE S1.** The layer thickness ( $d$ ), angles ( $\Theta_1, \Theta_2, \Theta_3, \Theta_4$ ) of relaxed and strain structures.

| Strain                | $d(\text{\AA})$  | $\Theta_1(^{\circ})$ | $\Theta_2(^{\circ})$ | $\Theta_3(^{\circ})$ | $\Theta_4(^{\circ})$ |
|-----------------------|------------------|----------------------|----------------------|----------------------|----------------------|
| Relaxed               | 3.14             | 91.15                | 88.86                | 90.88                | 89.09                |
| $\varepsilon_x = 6\%$ | 3.08<br>(-1.91%) | 91.54<br>(-0.43%)    | 88.57<br>(-0.33%)    | 89.08<br>(-1.98%)    | 93.96<br>(5.47%)     |
| $\varepsilon_y = 8\%$ | 3.06<br>(-2.54%) | 86.47<br>(-4.68%)    | 93.48<br>(5.20%)     | 93.54<br>(2.93%)     | 86.21<br>(-3.23%)    |

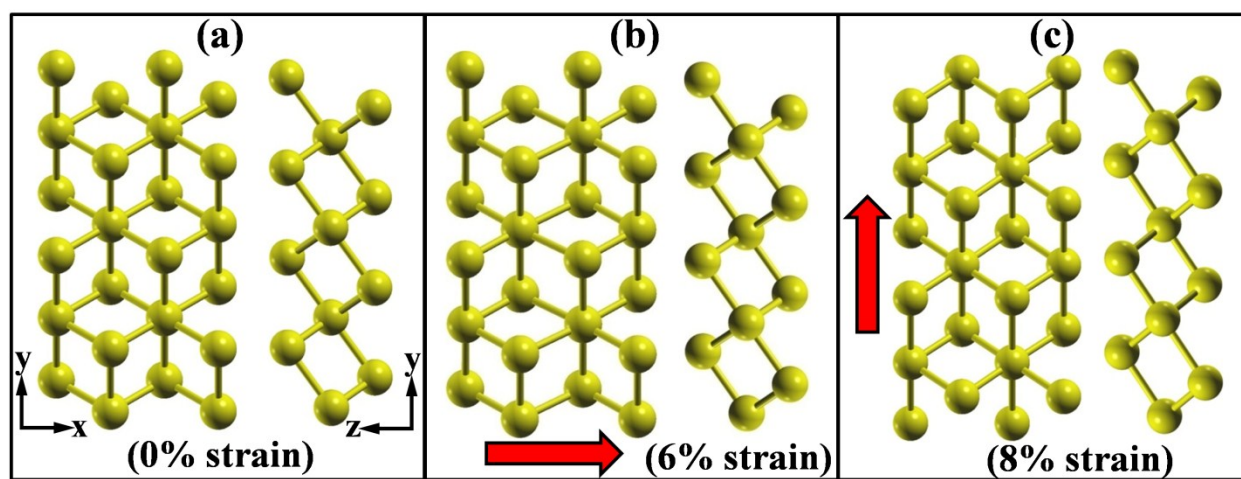

**Figure S1.** Structural variation with respect to strain (a), (b), (c) Structures of  $\alpha$ -Se at 0%, 6% (along x-direction), 8% (along y-direction) strain.

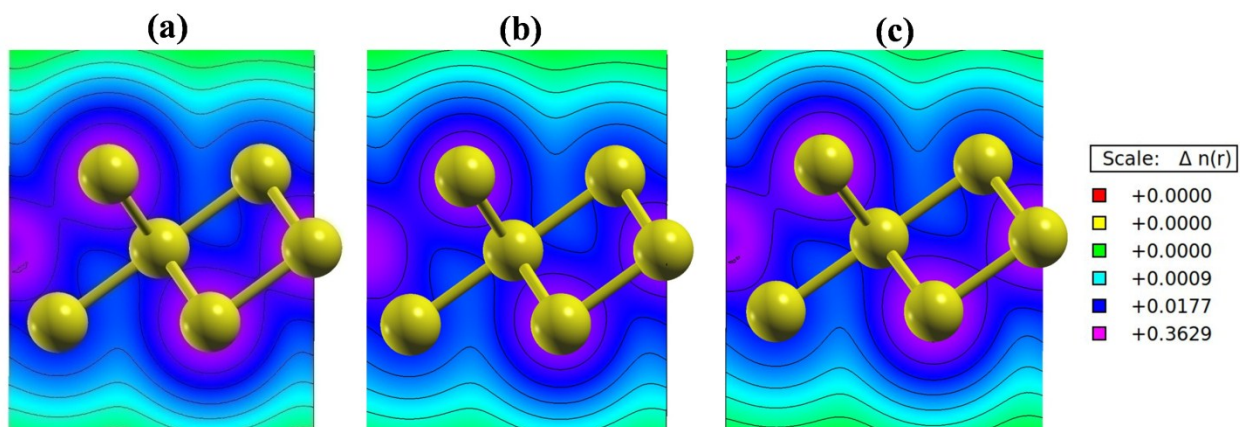

**Figure S2.** Charge density profile of  $\alpha$ -Se (a) at 0%, (b) at 6% (along x-direction), (c) 6% (along y-direction) strain.

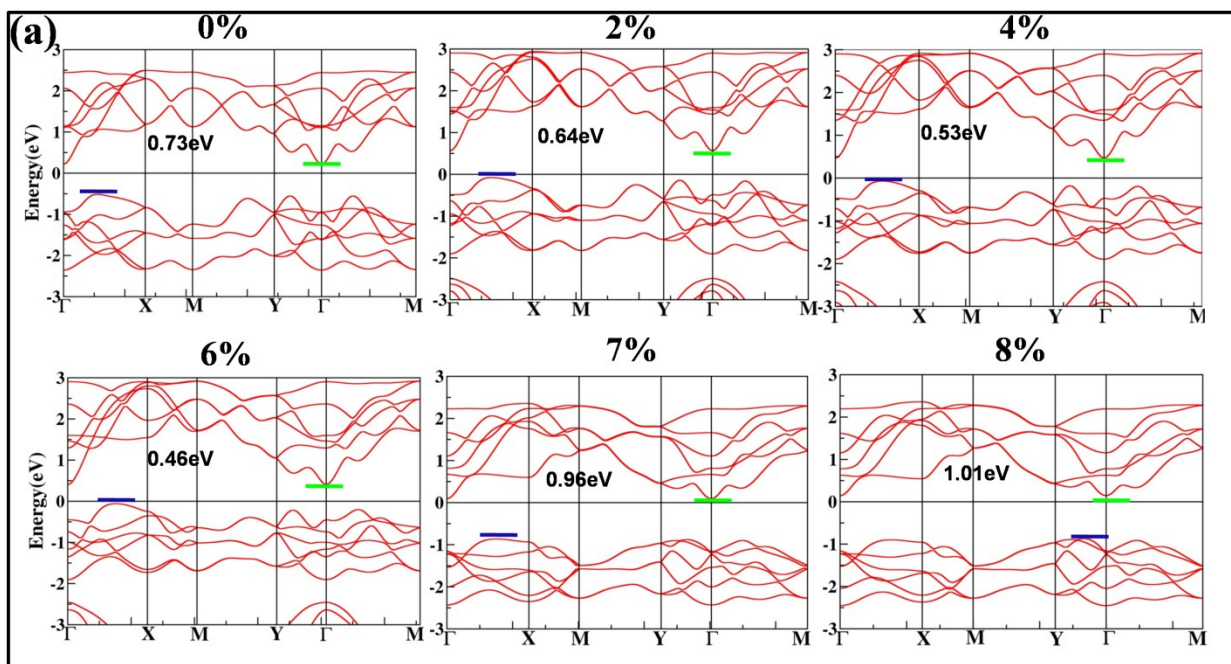

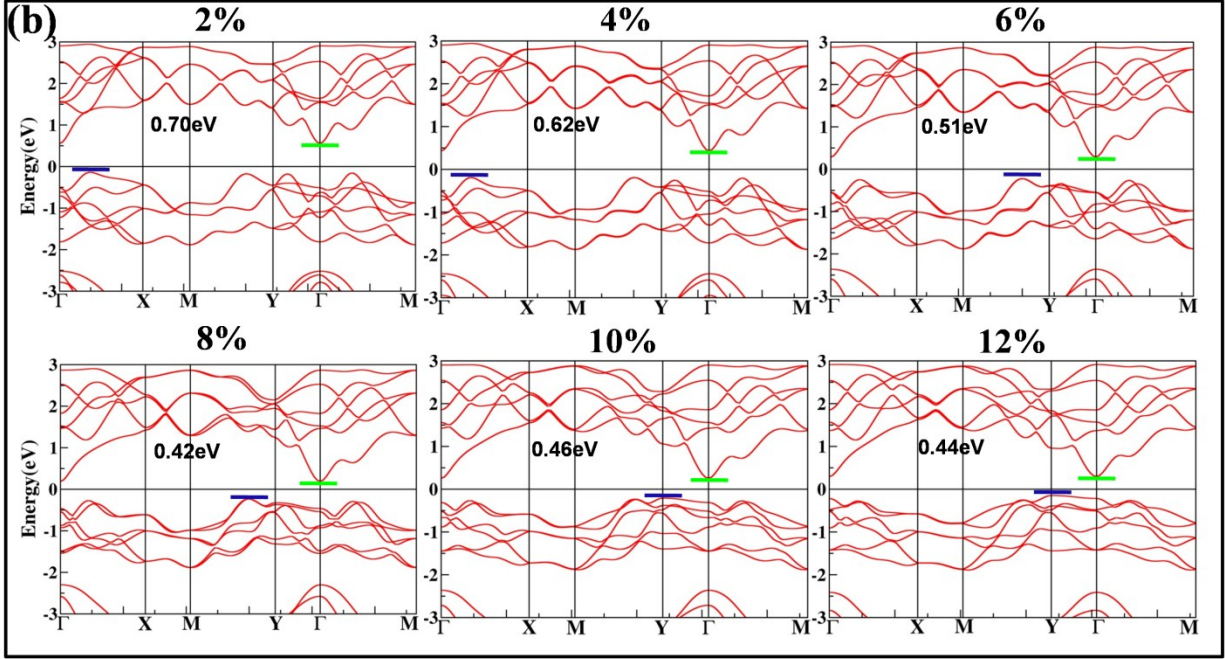

**Figure S3.** Effect of strain on band structures of  $\alpha$ -Se. (a) Along X-direction (6% is the critical strain). (b) Along Y-direction (8% is the critical strain)..

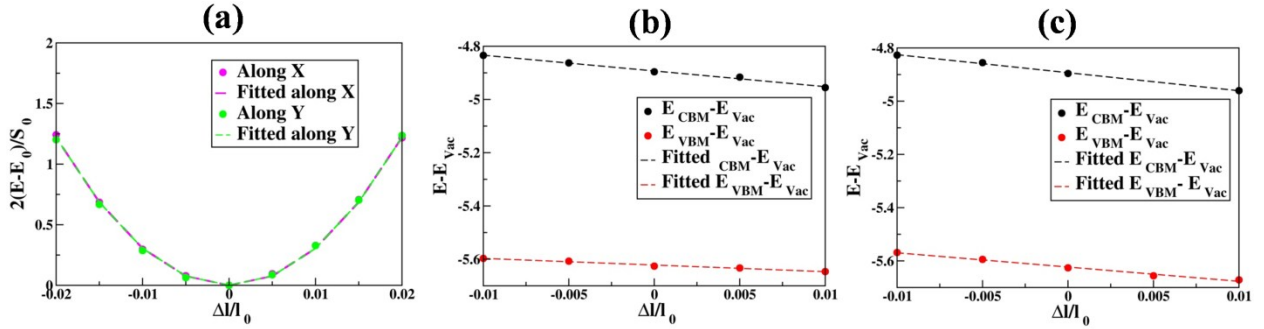

**Figure S4.** (a) Graph and parabolic fit between  $\frac{2(E - E_0)}{S_0}$  and  $\frac{\Delta l}{l_0}$ ,  $E - E_0$  is the difference in the total energy of stable and strained structure,  $S_0$  is the surface area of monolayer slab of  $\alpha$ -Se and  $\frac{\Delta l}{l_0}$  is the strain in the corresponding direction. (b), (c) Graph and straight fit graph between

$E - E_{vac}$  and  $\frac{\Delta l}{l_0}$  along x and y direction,  $E - E_{vac}$  is the difference in the energy of  $i^{\text{th}}$  band and vacuum energy,  $\frac{\Delta l}{l_0}$  is the strain in the corresponding direction.
